# Supplementary material for: 17O NMR and15N NMR chemical shifts of sterically-hindered amides: ground-state destabilization in amide electrophilicity
Source: Royal Society of Chemistry journal article supplement (doi:10.1039/c9cc01402k), 2019-01-01
Supplement: c9cc01402k1.pdf [file c9cc01402k1.pdf]

# **<sup>17</sup>O NMR and <sup>15</sup>N NMR Chemical Shifts of Sterically-Hindered Amides: Ground-State Destabilization in Amide Electrophilicity**

Vittorio Pace,<sup>§,\*</sup> Wolfgang Holzer,<sup>§</sup> Laura Ielo,<sup>§</sup> Guangrong Meng,<sup>†</sup> Shicheng Shi,<sup>†</sup> Mina Hanna,<sup>†</sup> Roman Szostak,<sup>‡</sup> and Michal Szostak<sup>†,\*</sup>

*<sup>§</sup>Department of Pharmaceutical Chemistry, Faculty of Life Sciences, University of Vienna, Althanstrasse 14, Vienna A-1090, Austria*

*<sup>†</sup>Department of Chemistry, Rutgers University, 73 Warren Street, Newark, NJ 07102, USA*

*<sup>‡</sup>Department of Chemistry, Wroclaw University, F. Joliot-Curie 14, Wroclaw 50-383, Poland*

[vittorio.pace@univie.ac.at](mailto:vittorio.pace@univie.ac.at); [michal.szostak@rutgers.edu](mailto:michal.szostak@rutgers.edu)

## Electronic Supplementary Information

|                                                                      |    |
|----------------------------------------------------------------------|----|
| <b>Table of Contents</b>                                             | 1  |
| • Additional Data Referred to from the Manuscript                    | 2  |
| • <sup>17</sup> O NMR Chemical Shift Measurement                     | 4  |
| • <sup>15</sup> N NMR Chemical Shift Measurement                     | 5  |
| • Additional Plots Referred to from the Manuscript                   | 6  |
| • Representative <sup>17</sup> O NMR and <sup>15</sup> N NMR Spectra | 11 |

### **Corresponding Authors:**

Prof. Dr. Vittorio Pace

Department of Pharmaceutical Chemistry, University of Vienna

Althanstrasse 14, Vienna A-1090, Austria

E-mail: [vittorio.pace@univie.ac.at](mailto:vittorio.pace@univie.ac.at)

Prof. Dr. Michal Szostak

Department of Chemistry, Rutgers University

73 Warren Street, Newark, NJ 07102, United States

E-mail: [michal.szostak@rutgers.edu](mailto:michal.szostak@rutgers.edu)

**Additional Data Referred to from the Manuscript**

To gain additional information, we next decided to analyze three series of control compounds (Table ESI-1). First, since adamantyl group represents one of the most sterically-hindered C-substituents,<sup>5b</sup> we prepared and analyzed a series of representative C-adamantyl amides (entries 1-5). As expected, the presence of an adamantyl results in strong deshielding of the carbonyl oxygen, which is attributed to increased rotation around the N–C(O) bond (up to 8 ppm, a plot of <sup>17</sup>O NMR(adamantyl) vs. <sup>17</sup>O NMR(pivaloyl) gives a linear correlation,  $R^2 = 0.98$ ). Along the same lines, N-TMP is the most sterically-hindered alkyl substituent that has been used to twist amide bonds.<sup>16</sup> We found that the use of a simple C-primary substituent in combination with N-TMP group results in a highly electrophilic carbonyl (entry 6, 398.2 ppm). This can be compared with the analogous N-Et<sub>2</sub> amide (entries 7-8), which shows a remarkable  $\Delta\sigma^{17}\text{O}$  of 66.8 ppm. Indeed, the unique electrophilic reactivity of N-TMP amides has been well demonstrated, and future studies will likely expand the growing utility of this class of sterically-destabilized amides.

**Table ESI-1.** <sup>17</sup>O NMR and <sup>15</sup>N NMR Chemical Shifts for Amides in Series **5-7**.

| Entry | Amide     | Series                            | $\delta(^{17}\text{O})^a$ ppm | $\delta(^{15}\text{N})^b$ ppm |
|-------|-----------|-----------------------------------|-------------------------------|-------------------------------|
| 1     | <b>5a</b> | Ad                                | 350.3                         | 93.9                          |
| 2     | <b>5b</b> | Ad                                | 347.6                         | 123.7                         |
| 3     | <b>5c</b> | Ad                                | 348.1                         | 116.9                         |
| 4     | <b>5d</b> | Ad                                | 350.5                         | 133.0                         |
| 5     | <b>5e</b> | Ad                                | 393.0                         | 132.6                         |
| 6     | <b>6</b>  | TMP                               | 398.2                         | 146.3                         |
| 7     | <b>7a</b> | PhCH <sub>2</sub>                 | 344.1                         | 126.1                         |
| 8     | <b>7b</b> | Ph(CH <sub>2</sub> ) <sub>2</sub> | 331.4                         | 126.1                         |

<sup>a</sup>Recorded at 54.1 MHz in C<sub>6</sub>D<sub>6</sub>. Chemical shifts are referenced to external H<sub>2</sub>O. <sup>b</sup>Recorded at 40.4 MHz in C<sub>6</sub>D<sub>6</sub>. Chemical shifts are referenced to external CH<sub>3</sub>NO<sub>2</sub>. Ad = adamantyl; TMP = 2,2,6,6-tetramethylpiperidiny1.

### **<sup>17</sup>O NMR Chemical Shift Measurement**

<sup>17</sup>O NMR spectra were recorded on Bruker Avance III 400 spectrometer (400 MHz for <sup>1</sup>H, 54.1 MHz for <sup>17</sup>O) from approximately 1.0 M C<sub>6</sub>D<sub>6</sub> solutions at 297 K using a “directly” detecting broadband observe (BBFO) probe, unless stated otherwise. Referencing was performed against external H<sub>2</sub>O (0 ppm, coaxial capillary) by measuring the difference between the water <sup>17</sup>O shift and the spectrometer values. For the <sup>17</sup>O NMR spectra 10 000 to 300 000 scans were accumulated (pulse width 90°, acquisition time 0.15 s, relaxation delay 0.2 s, spectral width 500 ppm) and Fourier transformed after a 200 Hz line broadening by exponential multiplication. To decrease acoustic ringing a pre-scan delay DE = 100 μs was used in the pulse sequence.

### **<sup>15</sup>N NMR Chemical Shift Measurement**

<sup>15</sup>N NMR spectra were recorded on Bruker Avance III 400 spectrometer (400 MHz for <sup>1</sup>H, 40.4 MHz for <sup>15</sup>N) from approximately 1.0 M C<sub>6</sub>D<sub>6</sub> solutions at 297 K using a “directly” detecting broadband observe (BBFO) probe, unless stated otherwise. The spectra were either taken via one-pulse experiments (inverse gated decoupling, digital resolution 1 Hz/data point, 15 s relaxation delay, 8192 scans) or via gradient-selected <sup>15</sup>N,<sup>1</sup>H HMBC spectra (2048×32 data matrix, 16 ppm spectral width for <sup>15</sup>N). Referencing was performed against neat, external nitromethane (0 ppm, coaxial capillary) by measuring the difference between the nitromethane <sup>15</sup>N shift and the spectrometer values. The reported values are referenced against nitromethane and given according to IUPAC by adding -380.5 ppm to the referenced spectrometer value for C<sub>6</sub>D<sub>6</sub>.

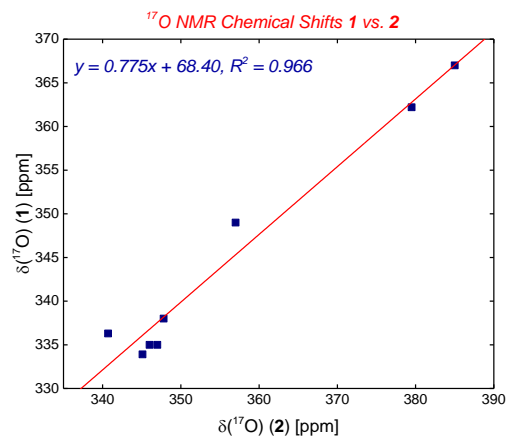

**Chart ESI-1.** Plot of <sup>17</sup>O NMR chemical shifts in amide series **1** vs. amide series **2**. Outlier: **1d**,  $\delta(^{17}\text{O}) = 327$  ppm.

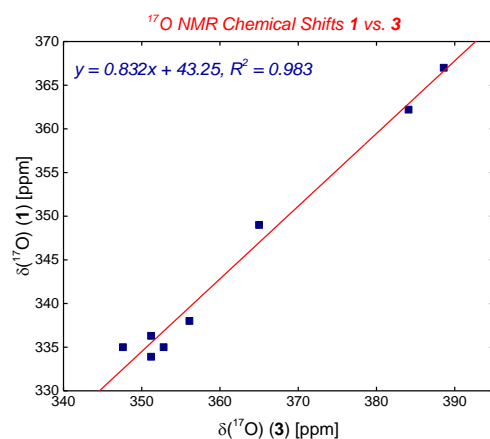

**Chart ESI-2.** Plot of <sup>17</sup>O NMR chemical shifts in amide series **1** vs. amide series **3**. Outlier: **1d**,  $\delta(^{17}\text{O}) = 327$  ppm.

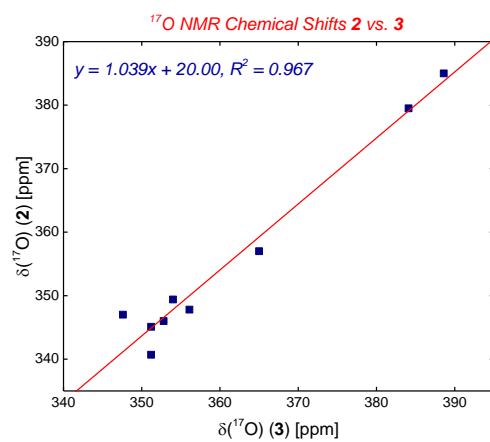

**Chart ESI-3.** Plot of <sup>17</sup>O NMR chemical shifts in amide series **2** vs. amide series **3**.

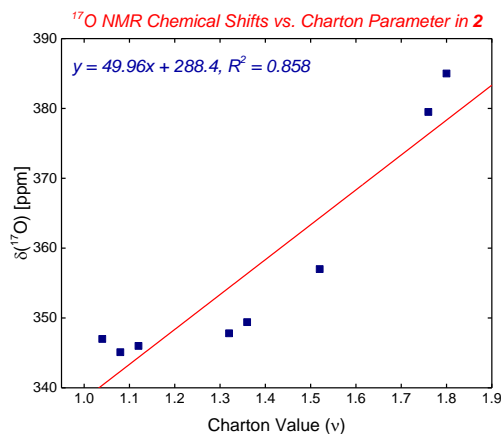

**Chart ESI-4.** Plot of <sup>17</sup>O NMR chemical shifts in amide series **2** vs. Charton Value ( $\nu$ ).  
Outlier: **2f**,  $\delta(^{17}\text{O}) = 340.7$  ppm.

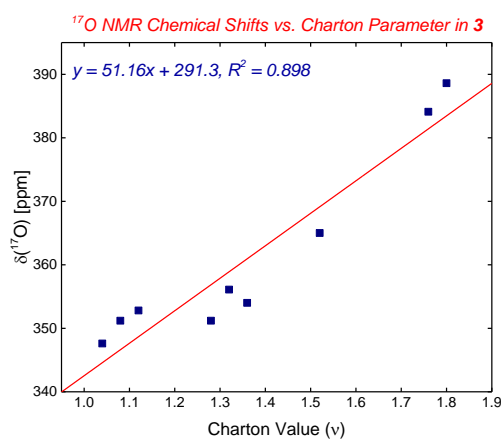

**Chart ESI-5.** Plot of <sup>17</sup>O NMR chemical shifts in amide series **3** vs. Charton Value ( $\nu$ ).

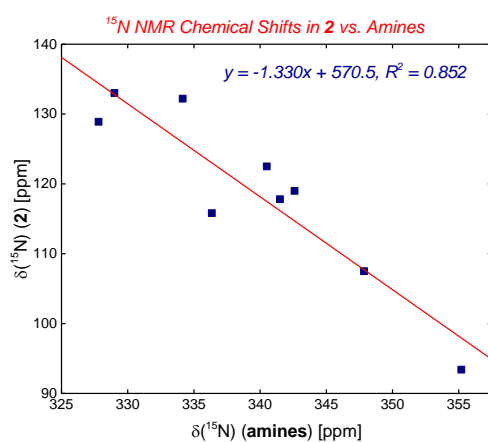

**Chart ESI-6.** Plot of <sup>15</sup>N NMR chemical shifts in amide series **2** vs. <sup>15</sup>N NMR chemical shifts in amines.

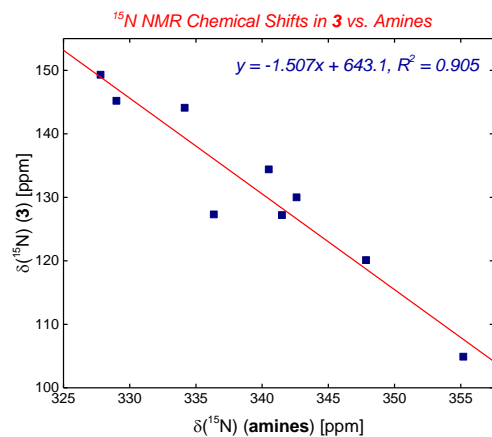

**Chart ESI-7.** Plot of <sup>15</sup>N NMR chemical shifts in amide series **3** vs. <sup>15</sup>N NMR chemical shifts in amines.

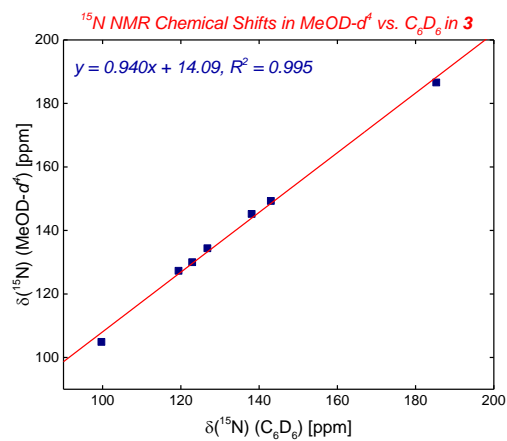

**Chart ESI-8.** Plot of <sup>15</sup>N NMR chemical shifts in MeOD-*d*<sup>4</sup> vs. C<sub>6</sub>D<sub>6</sub> in **3**.



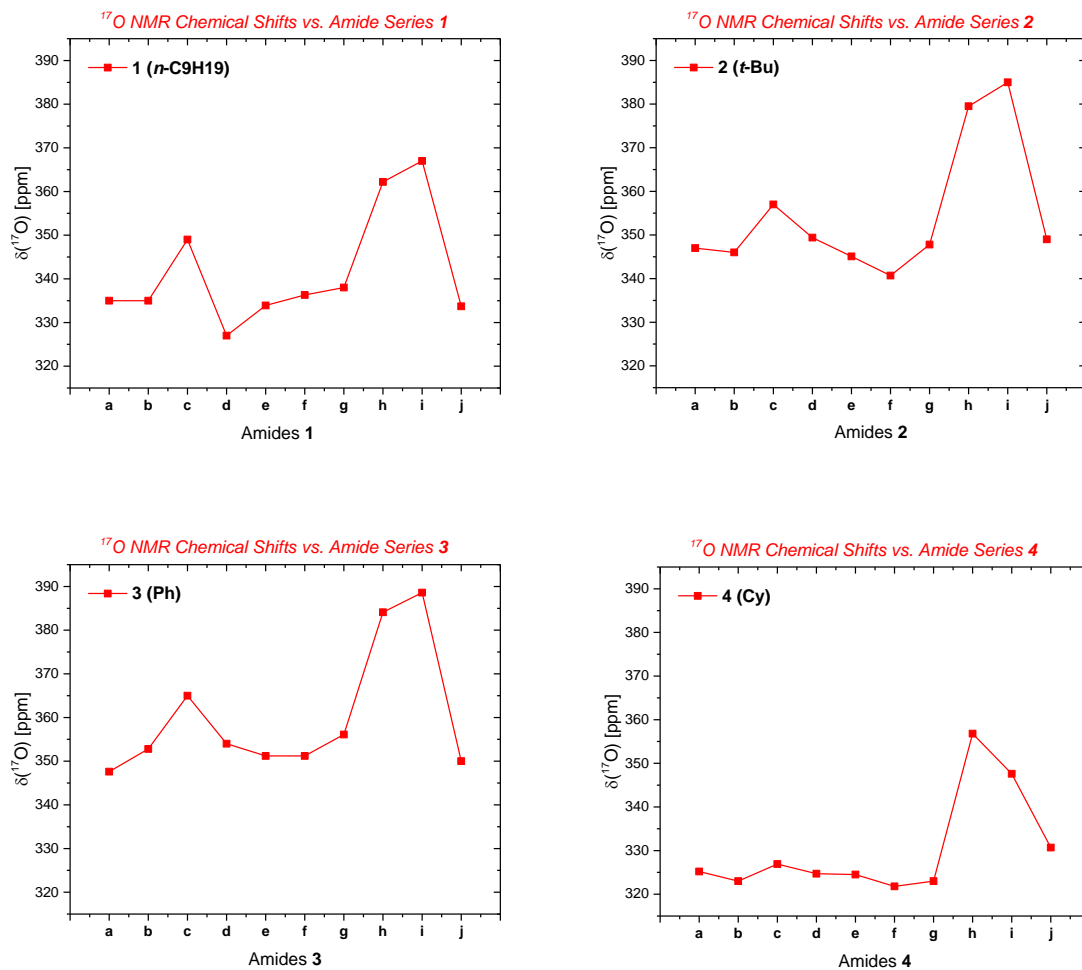

**Chart ESI-9.** Plots of  $^{17}\text{O}$  NMR chemical shifts vs. amide series **1-4** showing  $\delta(^{17}\text{O})$  as a function of individual amides **1-4**.

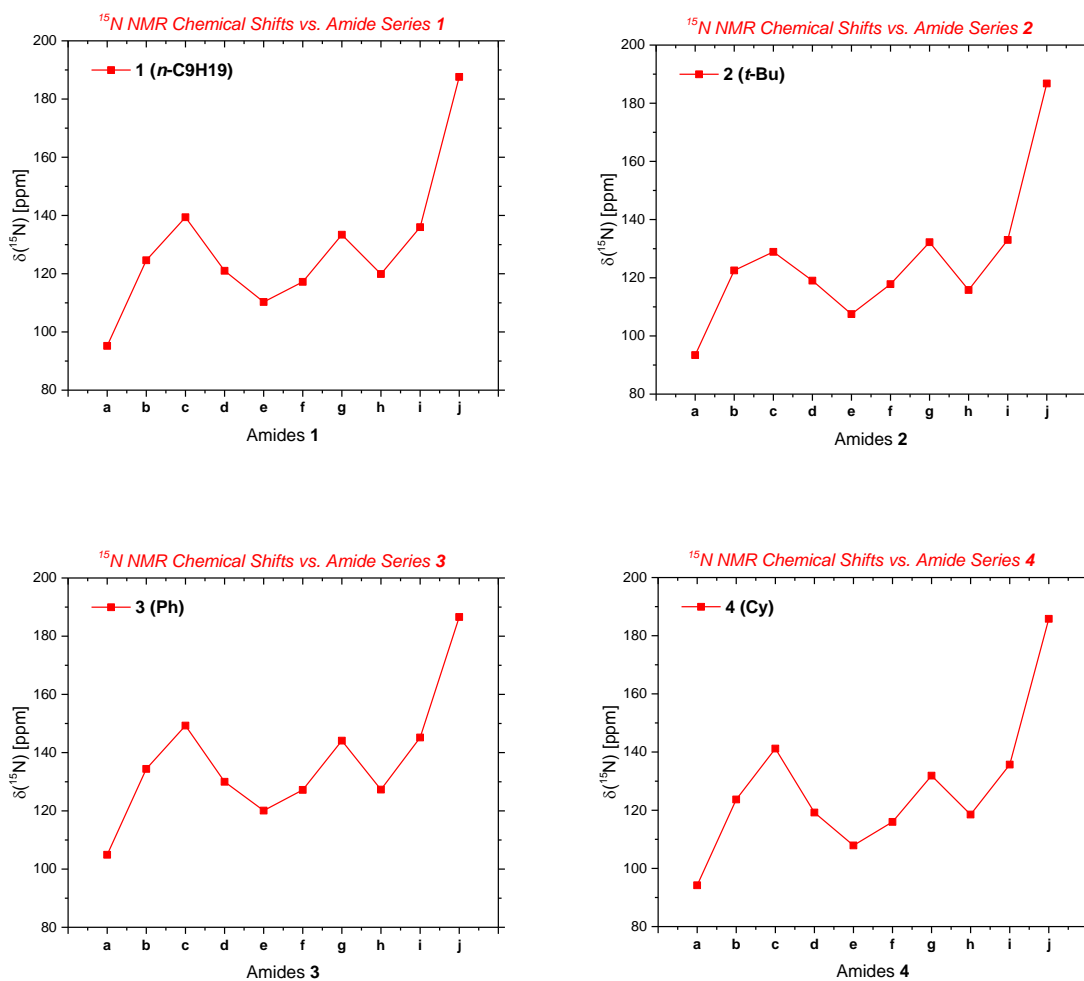

**Chart ESI-10.** Plots of  $^{15}\text{O}$  NMR chemical shifts vs. amide series **1-4** showing  $\delta(^{15}\text{O})$  as a function of individual amides **1-4**.

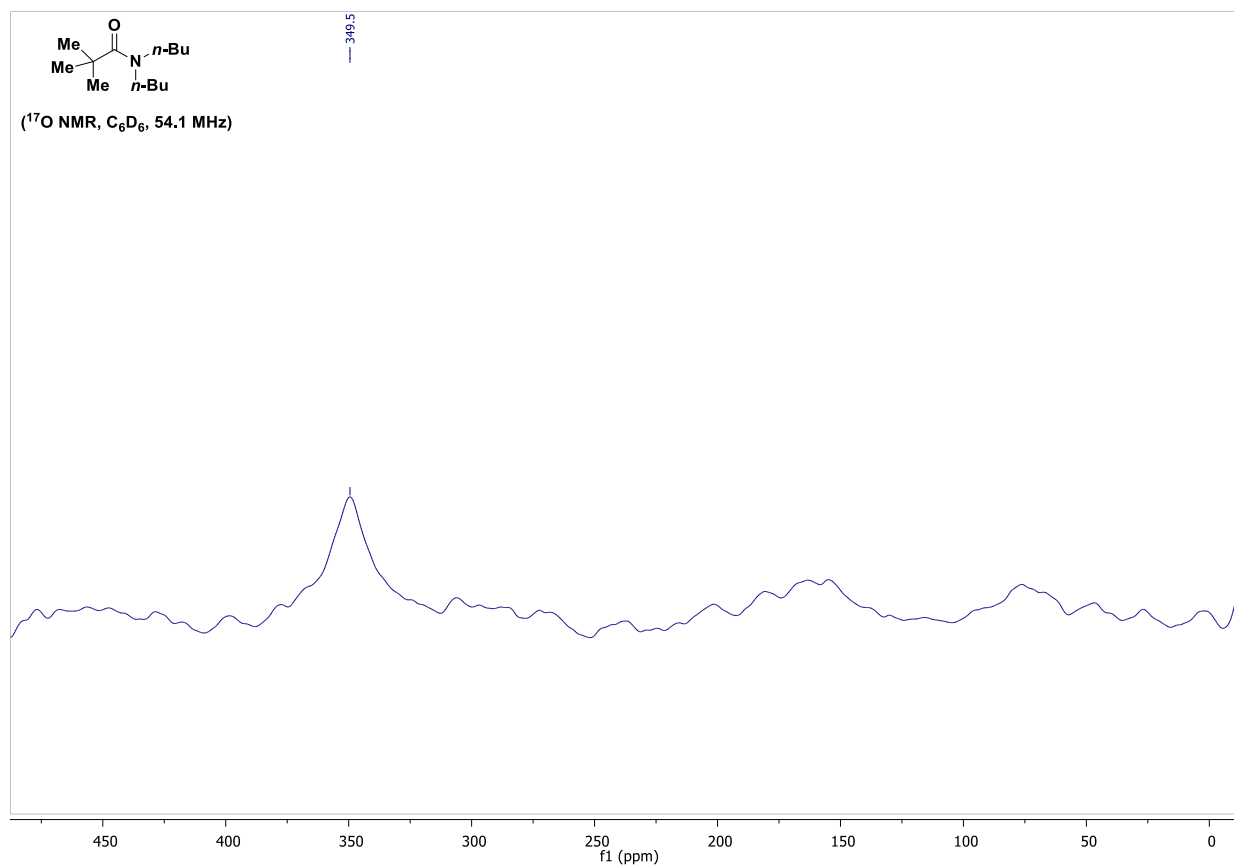

**Figure ESI-1.**  $^{17}\text{O}$  NMR Spectrum of *N,N*-Dibutyl-2,2-dimethylpropanamide.

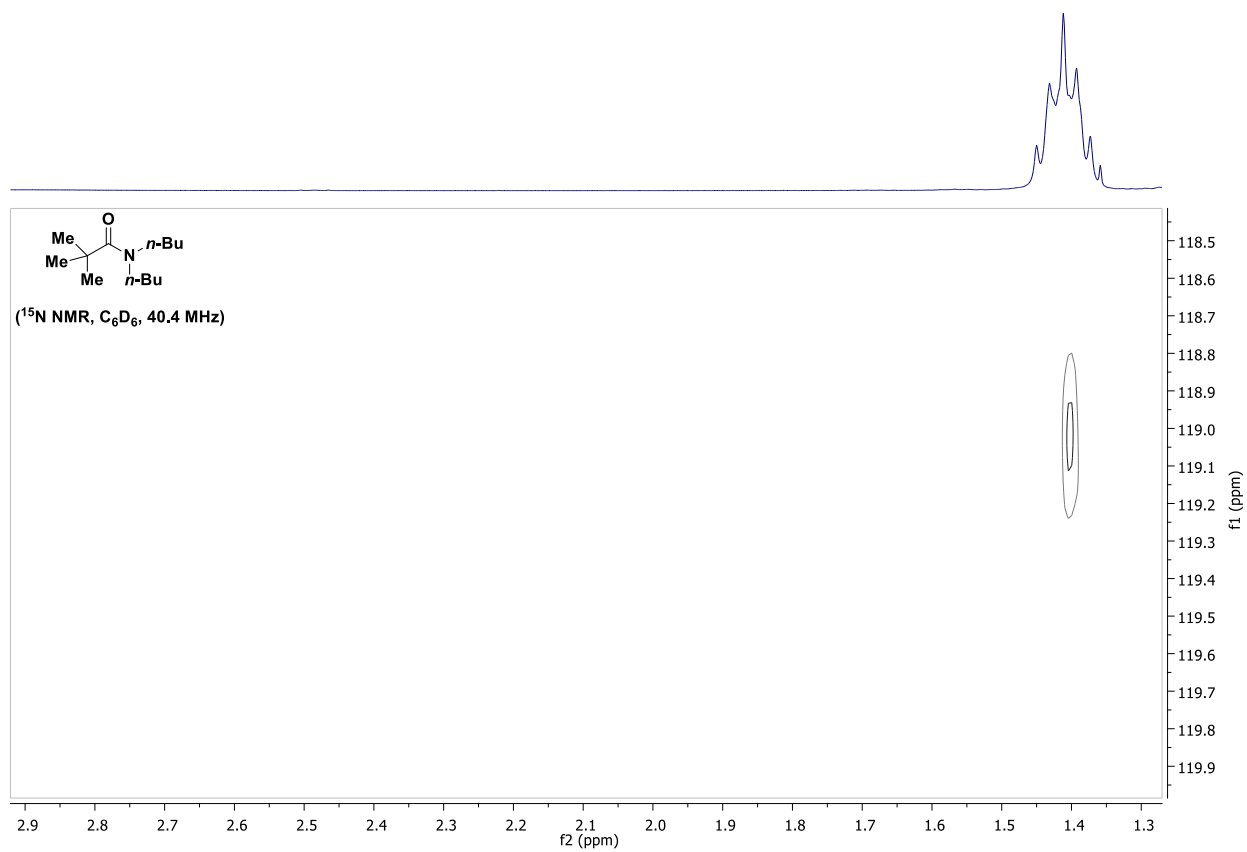

**Figure ESI-2.** <sup>15</sup>N NMR Spectrum of *N,N*-Dibutyl-2,2-dimethylpropanamide.

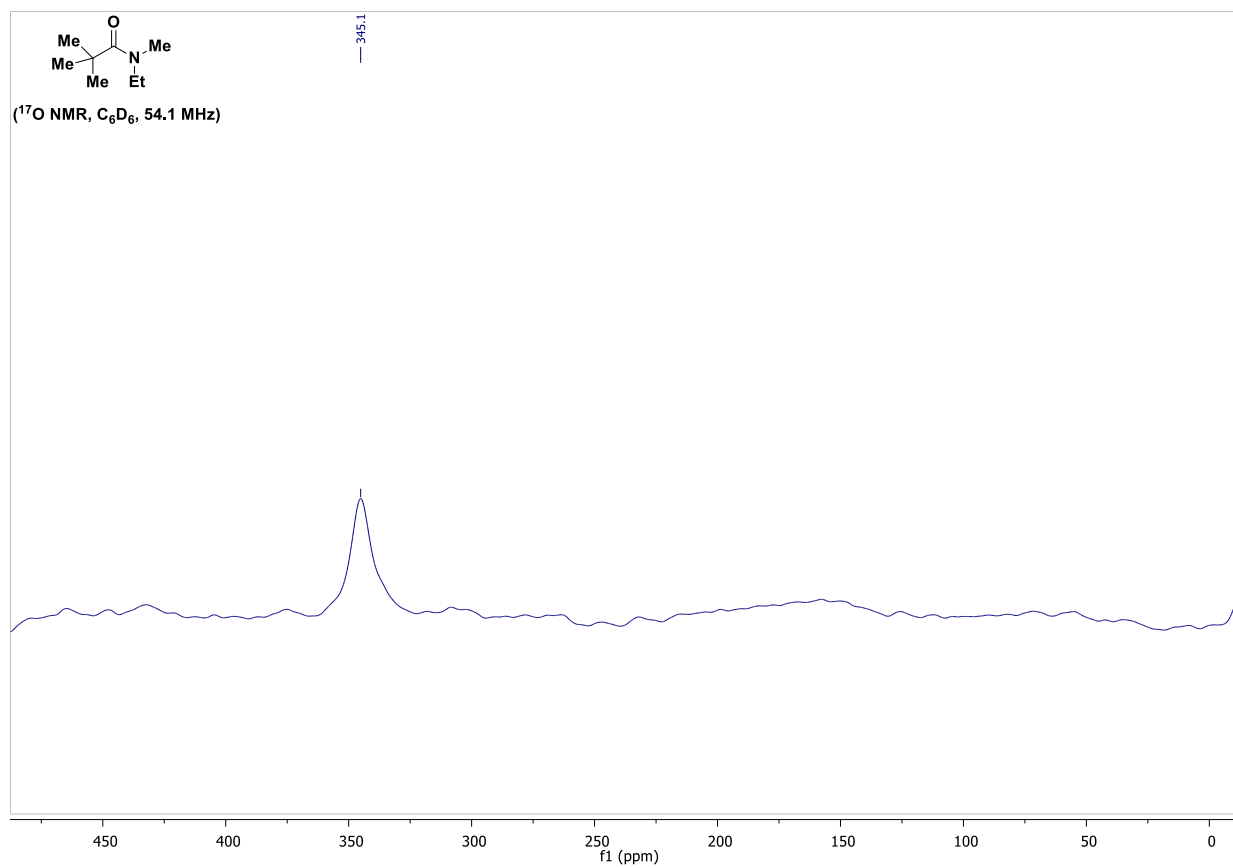

**Figure ESI-3.**  $^{17}\text{O}$  NMR Spectrum of *N*-Ethyl-*N*,2,2-trimethylpropanamide.

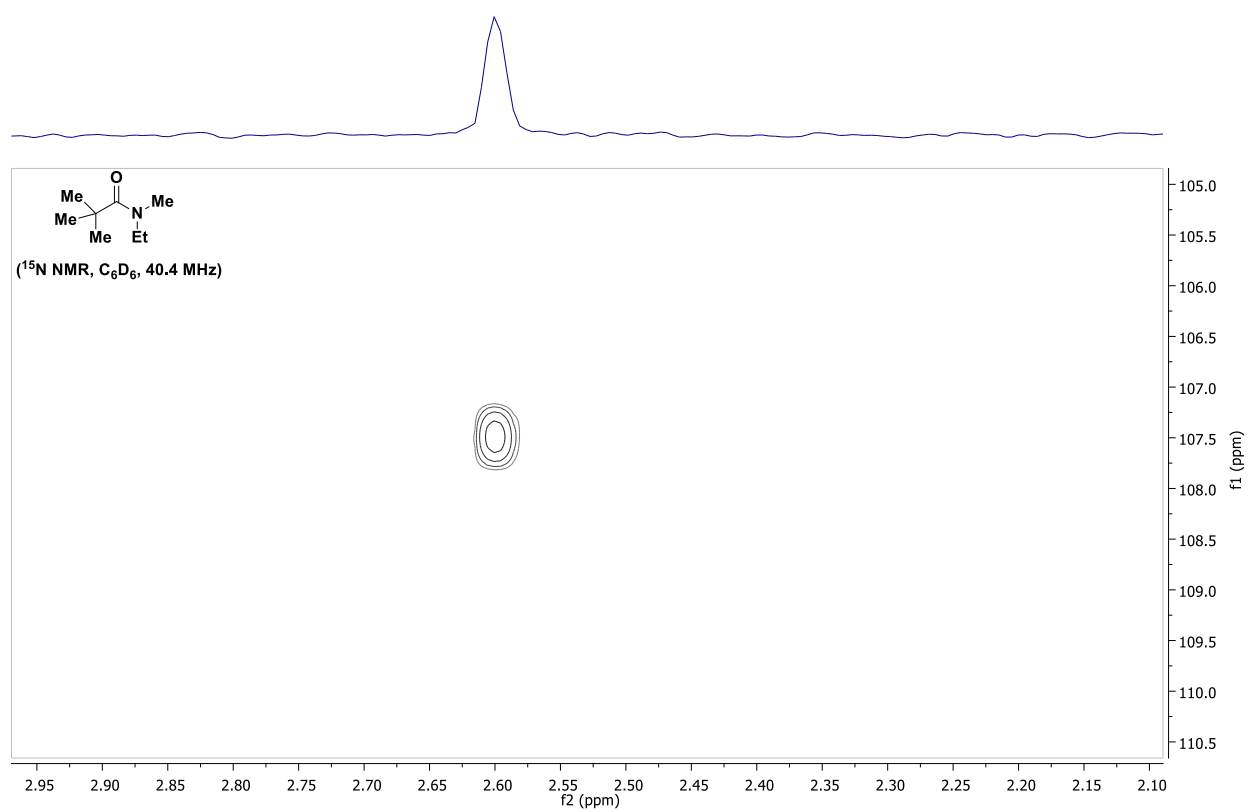

**Figure ESI-4.** <sup>15</sup>N NMR Spectrum of *N*-Ethyl-*N*,2,2-trimethylpropanamide.

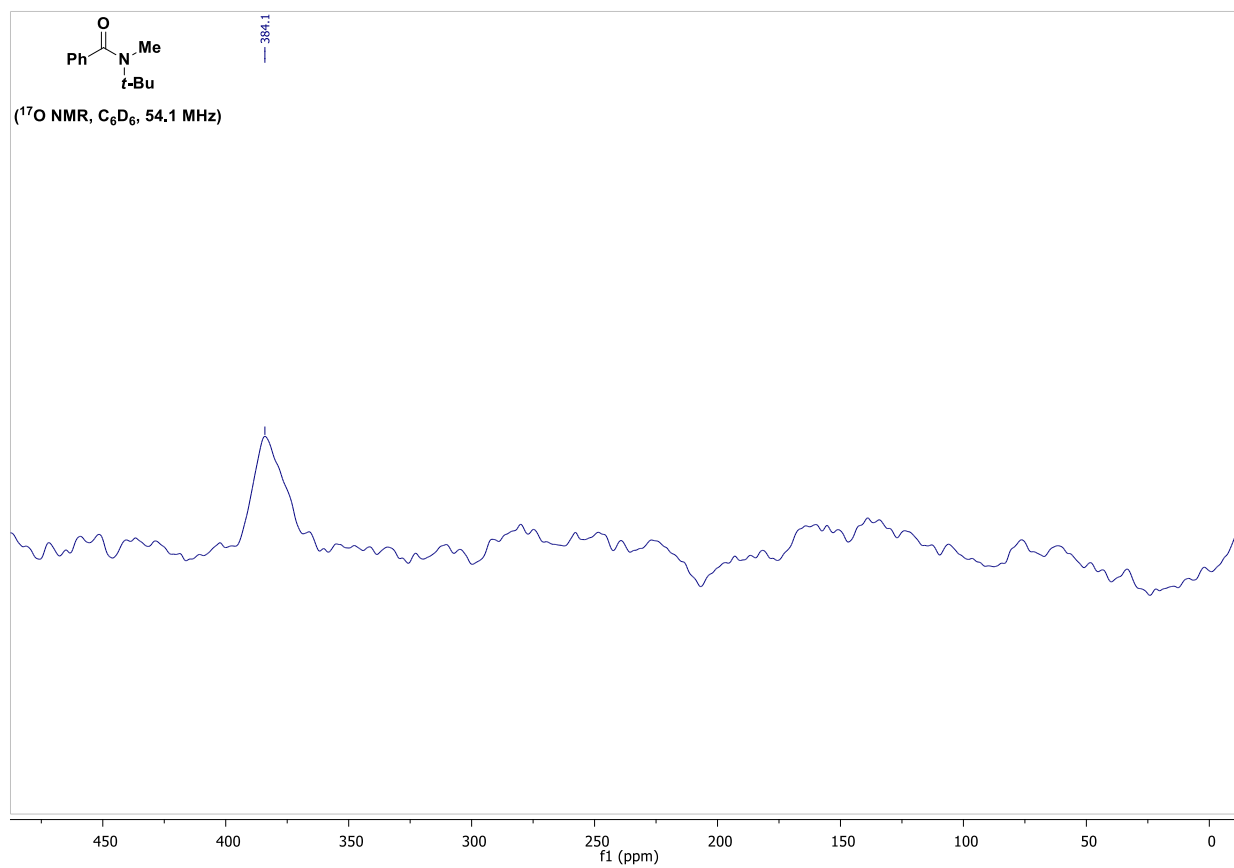

**Figure ESI-5.** <sup>17</sup>O NMR Spectrum of *N-tert*-Butyl-*N*-methylbenzamide.

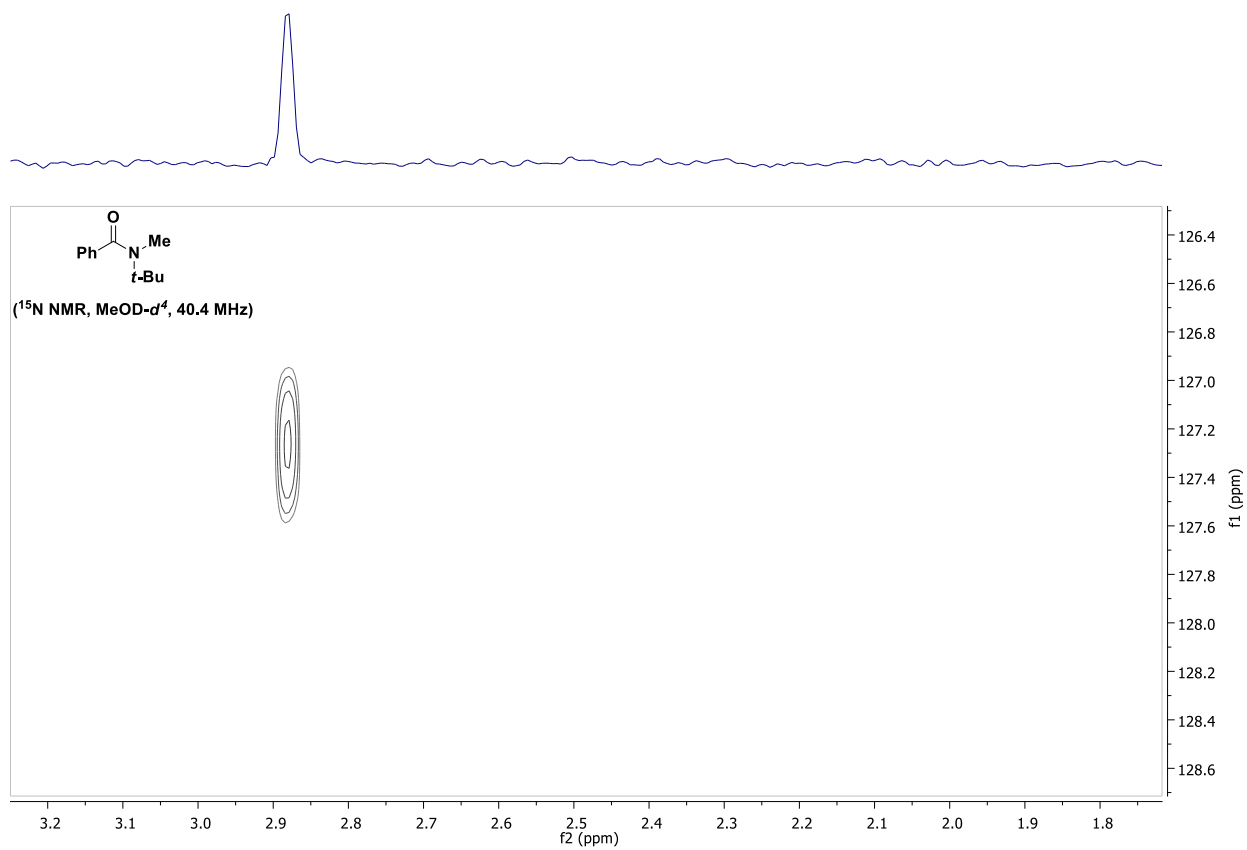

**Figure ESI-6.**  $^{15}\text{N}$  NMR Spectrum of *N-tert-Butyl-N-methylbenzamide*.



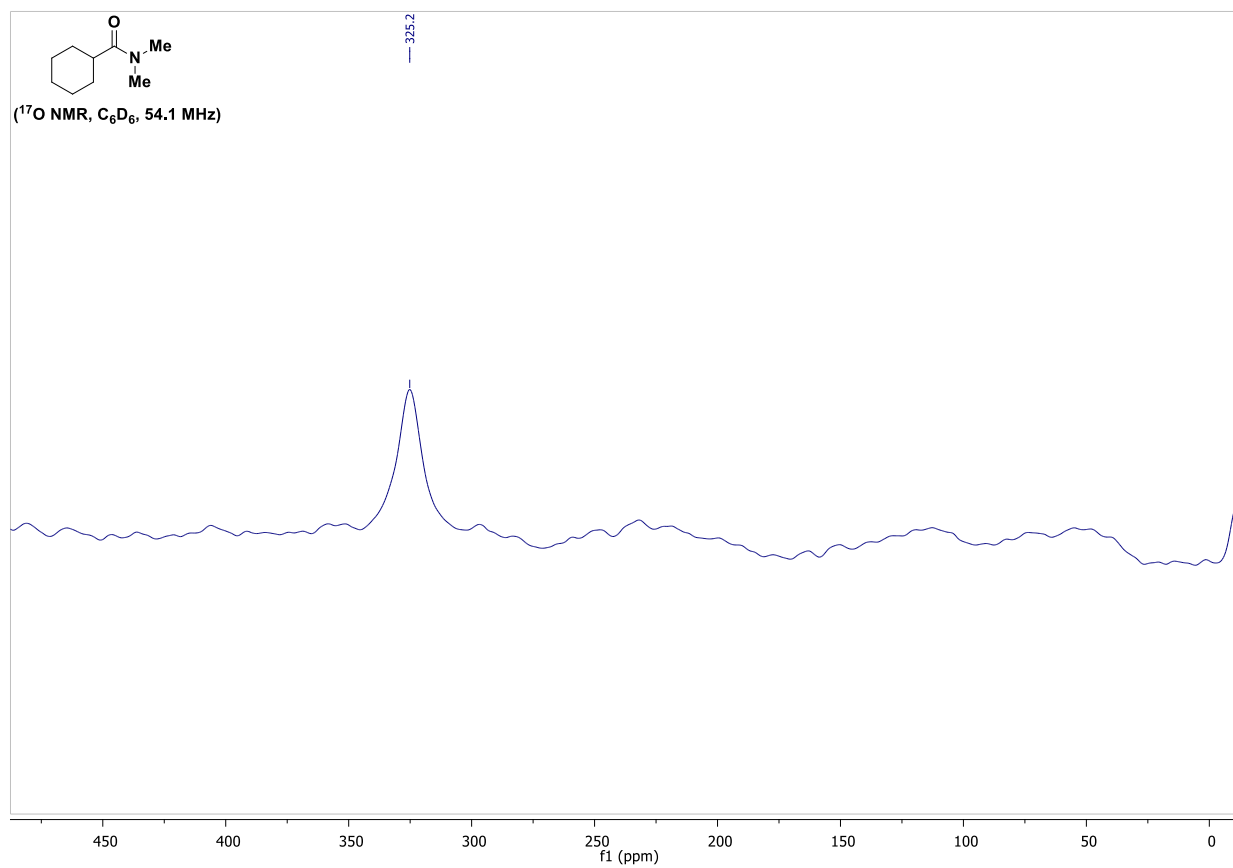

**Figure ESI-7.** <sup>17</sup>O NMR Spectrum of *N,N*-Dimethylcyclohexanecarboxamide.

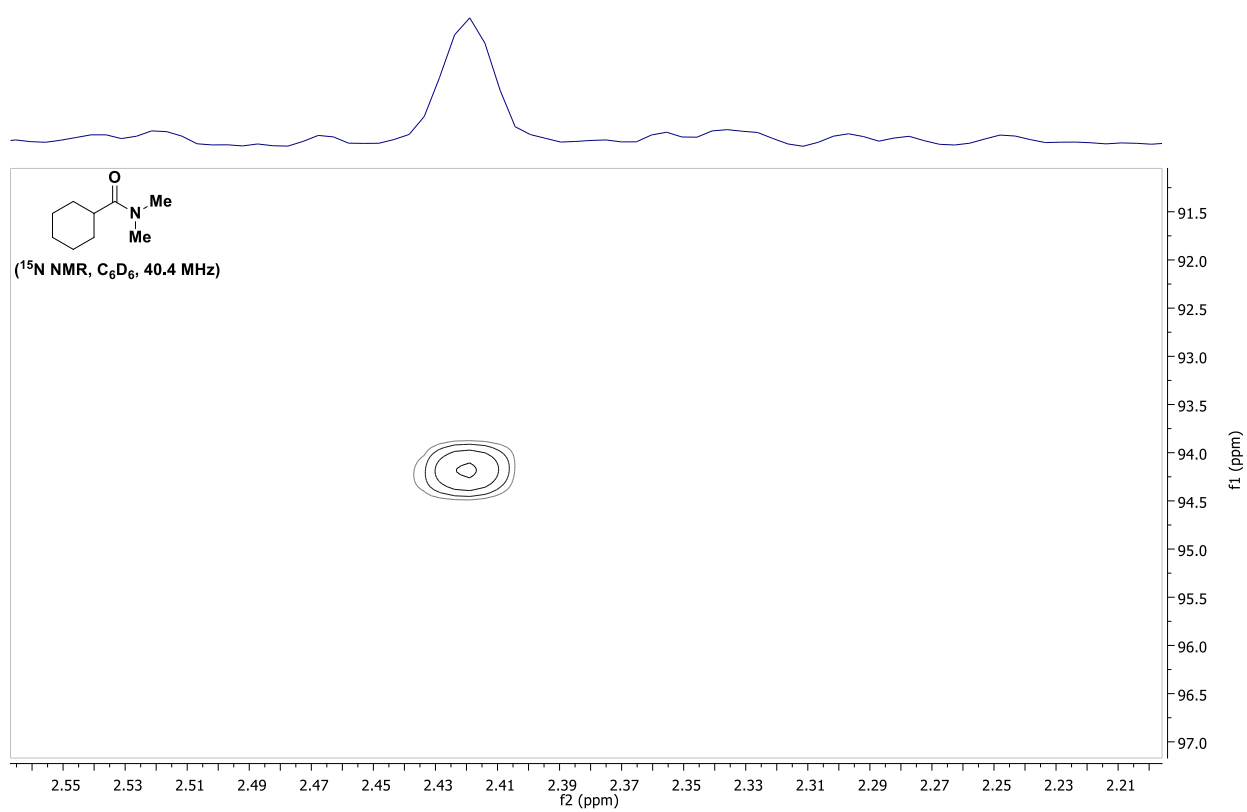

**Figure ESI-8.** <sup>15</sup>N NMR Spectrum of *N,N*-Dimethylcyclohexanecarboxamide.

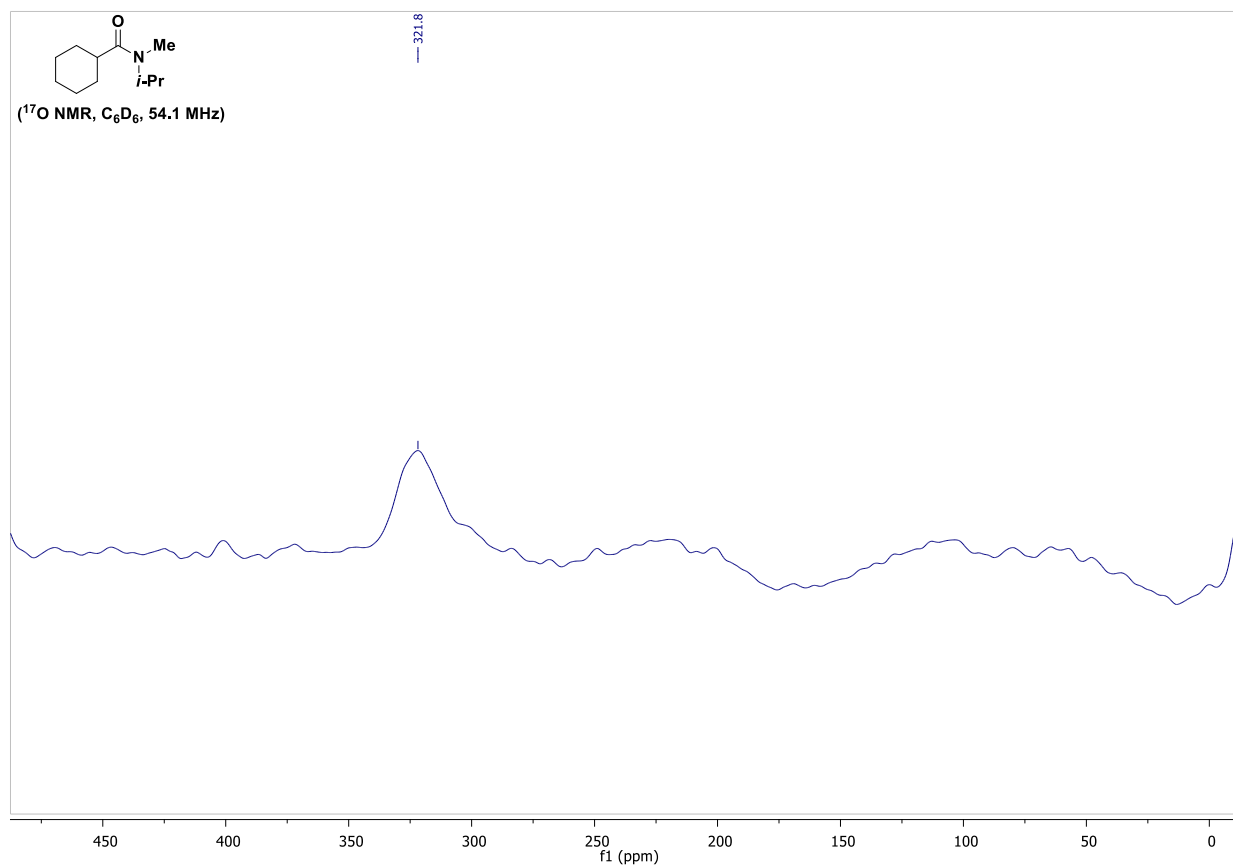

**Figure ESI-9.** <sup>17</sup>O NMR Spectrum of *N*-Methyl-*N*-(propan-2-yl)cyclohexanecarboxamide.

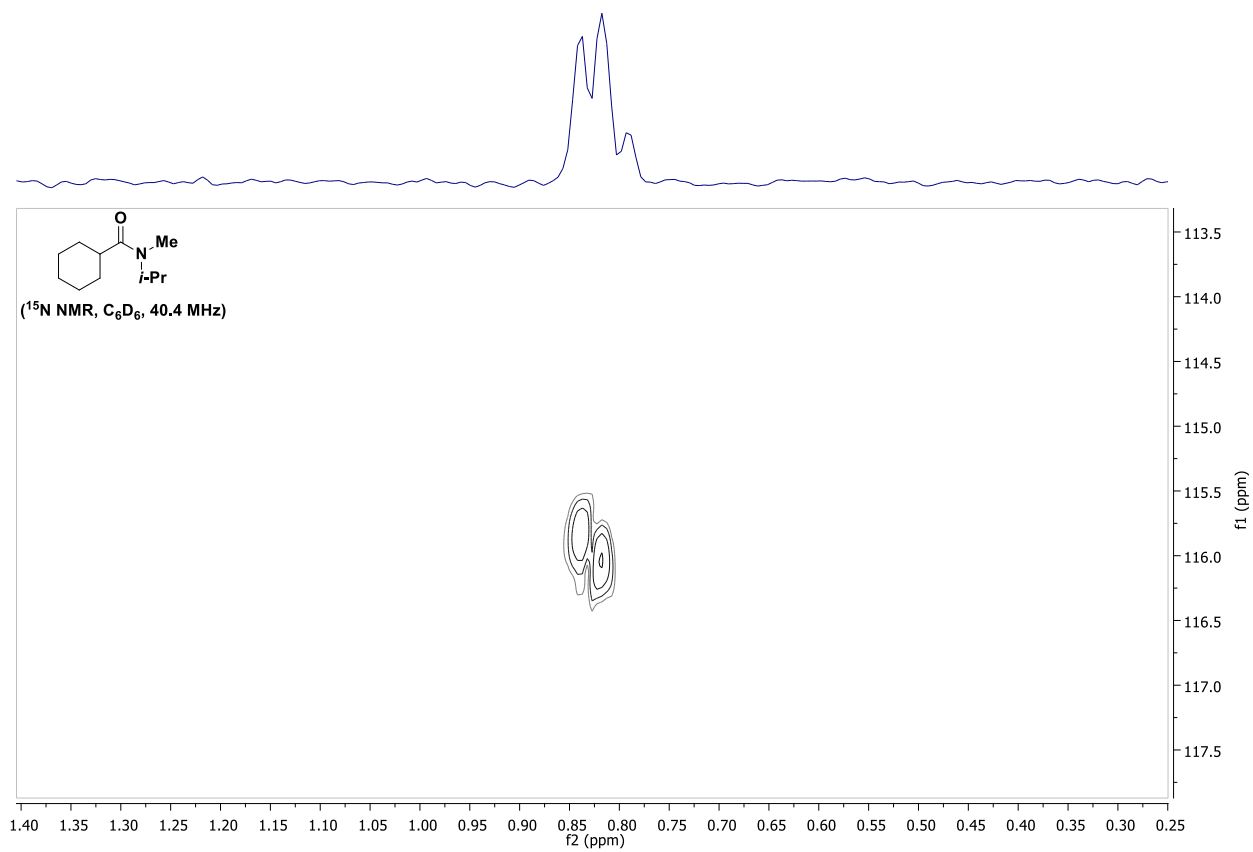

**Figure ESI-10.**  $^{15}\text{N}$  NMR Spectrum of *N*-Methyl-*N*-(propan-2-yl)cyclohexanecarboxamide.
